# Supplementary material for: How context influences the interpretation of facial expressions: a source localization high-density EEG study on the “Kuleshov effect”
Source: PubMed Central journal article supplement (PMC6376122; doi:10.1038/s41598-018-37786-y), 2019-02-14
Supplement: 41598_2018_37786_MOESM1_ESM.pdf [file 41598_2018_37786_MOESM1_ESM.pdf]

## **How context influences the interpretation of facial expressions: a source localization high-density EEG study on the “Kuleshov effect”.**

Marta Calbi<sup>1\*</sup>, Francesca Siri<sup>1</sup>, Katrin Heimann<sup>2</sup>, Daniel Barratt<sup>3</sup>, Vittorio Gallese<sup>1,4\*</sup>, Anna Kolesnikov<sup>5</sup>, Maria Alessandra Umiltà<sup>6</sup>

<sup>1</sup> Department of Medicine and Surgery, Unit of Neuroscience, University of Parma, Parma, Italy

<sup>2</sup> Interacting Minds Center, University of Aarhus, Aarhus, Denmark

<sup>3</sup> Department of Management, Society and Communication, Copenhagen Business School, Copenhagen, Denmark

<sup>4</sup> Institute of Philosophy, School of Advanced Study, University of London, London, UK

<sup>5</sup> Department of Humanities, Social Sciences and Cultural Industries, University of Parma, Parma, Italy.

<sup>6</sup> Department of Food and Drug Sciences, University of Parma, Parma, Italy

\* Corresponding author

E-mail: [calbimarta@gmail.com](mailto:calbimarta@gmail.com)

[vittorio.gallese@unipr.it](mailto:vittorio.gallese@unipr.it)

### **Assessment**

In order to exclude the possibility that personality traits or deficits in emotion recognition and empathic abilities could influence task performance, one day before the experimental session, participants were asked to fill in several questionnaires via Google Forms: the Toronto Alexithymia Scale (TAS-20), which measures the ability to identify and describe emotions and feelings, and has three subscales (Difficulty Describing Feelings (DDF), Difficulty Identifying Feelings (DIF) and Externally-Oriented Thinking (EOT))<sup>68</sup>; the Interpersonal Reactivity Index (IRI), which assesses the empathic abilities of each participant, and has four subscales (Perspective Taking (PT), Fantasy (FS), Empathic Concern (EC) and Personal Distress (PD))<sup>69</sup>; and the Behavioural Activation System/Behavioural Inhibition System (BIS/BAS), which measures individual differences in the sensitivity of these systems, and has one BIS-related scale and three BAS-related scales (BAS Drive, BAS Fun Seeking and BAS Reward Responsiveness)<sup>70</sup>. Once participants arrived at the laboratory, they were also asked to fill in the State-Trait Anxiety Inventory (STAI)<sup>71</sup>, in order to assess

the level of anxiety of each participant as a permanent trait and/or as contextual. Below are the mean values obtained in each questionnaire by the 19 participants whose EEG data were analysed:

TAS-20: the mean DDF subscale score  $\pm$  SD was  $11.37 \pm 4.80$ ; the mean DIF subscale score  $\pm$  SD was  $13.80 \pm 7.4$ ; the mean EOT subscale score  $\pm$  SD was  $13.11 \pm 4.20$ ; the mean total score  $\pm$  SD was  $38.30 \pm 13.45$ ;

IRI: the mean EC score  $\pm$  SD was  $19.90 \pm 5.05$ ; the mean PD score  $\pm$  SD was  $10 \pm 4.53$ ; the mean PT score  $\pm$  SD was  $17.80 \pm 4.90$ ; the mean FS score  $\pm$  SD was  $16.74 \pm 5.45$ .

BIS/BAS: the mean BIS score  $\pm$  SD was  $24.11 \pm 3.80$ ; the mean BAS Drive score  $\pm$  SD was  $13.60 \pm 2.70$ ; the mean BAS Fun Seeking score  $\pm$  SD was  $12.63 \pm 3.17$ ; the mean BAS Reward Responsiveness score  $\pm$  SD was  $21.11 \pm 3.05$ ;

STAI: the mean STAI X2 Trait score  $\pm$  SD was  $42.32 \pm 7.51$ ; the mean STAI X1 Pre score  $\pm$  SD was  $34.30 \pm 6.40$ ; the mean STAI X1 Post score  $\pm$  SD was  $16 \pm 3.50$ ;

## **Categorization task analysis and results**

If the emotional contexts had no effect on the emotional attribution of the target person's emotional state (the null hypothesis), then each of the seven categories should have been selected with an equal degree of probability<sup>37,38</sup>; that is, a relative frequency approaching 14.3%.

For the Fearful context, participants tended to choose negative emotions more frequently than the other options (Sadness=24.2%, Fear=23.5%, Disgust=15%, Anger=12.8%, Surprise=11.3%, Happiness=9.5%, Other=3.6%).

For the Happy context, participants tended to choose happiness more frequently than the other options (Happiness=42.6%, Sadness=17.3%, Surprise=13.4%, Other=8.1%, Anger=7%, Fear=6%, Disgust=5.7%).

For the Neutral context, participants tended to choose both happiness and sadness more frequently than the other options (Happiness=25.2%, Sadness=23.7%, Other=14.1%, Surprise=12.8%, Anger=11.1%, Fear=8.3%, Disgust=5%).

To further examine the relation among participants' answers across the three different contexts, a Pearson's chi-square test of independence was performed. As expected, the associations among these variables were significant ( $\text{Chi-Square}_{(12, 5184)} = 911.5979, p < .01$ ). Furthermore, by inspecting the individual cells in Crosstabulation in Supplementary Table S1, it emerges that, for the Fearful context, participants tended to choose negative emotions more frequently than the other options (Sadness=24.2%, Fear=23.5%, Disgust=15%, Anger=12.8%, Surprise=11.3%, Happiness=9.5%, Other=3.6%). Specifically, the cells associated with negative emotions had positive adjusted standardized residual values (Sadness=3.1,  $p < .01$ ; Fear=16.8,  $p < .001$ ; Disgust=11.7,  $p < .001$ ; Anger=4.3,  $p < .001$ ), distributed according to the Standard Normal Distribution (Mean = 0, Standard Deviation = 1, cutoff point set at  $|3|$  with  $p < .01$ ), indicating that participants chose negative emotions significantly more frequently than what would be expected by chance.

In the opposite way, the cell associated with Happiness had negative adjusted standardized residual values (Happiness = -18.9,  $p < .001$ ), indicating that participants chose Happiness significantly less frequently than what would be expected by chance.

For the Happy context, participants tended to choose Happiness more frequently than the other options (Happiness=42.6%, Sadness=17.3%, Surprise=13.4%, Other=8.1%, Anger=7%, Fear=6%, Disgust=5.7%). The cell associated with Happiness had, indeed, positive adjusted standardized residual values (Happiness=19.6,  $p < .001$ ), indicating that participants chose Happiness significantly more frequently than what would be expected by chance. On the other hand, the cells associated with negative emotions had negative adjusted standardized residual values (Sadness = -5.5,  $p < .001$ , Fear = -10.2,  $p < .001$ , Disgust = -5.2,  $p < .001$ , Anger = -5.6,  $p < .001$ ), indicating that participants chose negative emotions less frequently than what would be expected by chance.

For the Neutral context, participants tended to choose both Happiness and Sadness more frequently than the other options (Happiness=25.2%, Sadness=23.7%, Other=14.1%, Surprise=12.8%, Anger=11.1%, Fear=8.3%, Disgust=5%). It is worth noting that, in this context the cells associated with Disgust and Fear had negative adjusted standardized residual values (Disgust = -6.5,  $p < .001$ , Anger = -6.6,  $p < .001$ ), indicating that participants chose these two emotions less frequently than what would be expected by chance. For all analyses, we used R (R Core Team, 2012) and `descr`<sup>72</sup>.

| <b>FEAR</b>      | <b>Anger</b> | <b>Disgust</b> | <b>Fear</b> | <b>Happiness</b> | <b>Sadness</b> | <b>Surprise</b> | <b>Other</b> |
|------------------|--------------|----------------|-------------|------------------|----------------|-----------------|--------------|
| Observed         | 222          | 258            | 406         | 165              | 419            | 195             | 63           |
| Expected         | 178.00       | 147.00         | 217.00      | 445.67           | 375.67         | 215.67          | 149.00       |
| ChiSq.           | 10.88        | 83.82          | 164.61      | 176.75           | 5.00           | 1.98            | 49.64        |
| Adj. std. res.   | 4.26         | 11.72          | 16.80       | -18.90           | 3.10           | -1.84           | -9.03        |
| <b>HAPPINESS</b> |              |                |             |                  |                |                 |              |
| Observed         | 120          | 98             | 102         | 737              | 299            | 231             | 141          |
| Expected         | 178.00       | 147.00         | 217.00      | 445.67           | 375.67         | 215.67          | 149.00       |
| ChiSq.           | 18.90        | 16.33          | 60.94       | 190.45           | 15.65          | 1.09            | 0.43         |
| Adj. std. res.   | -5.62        | -5.17          | -10.22      | 19.62            | -5.48          | 1.37            | -0.84        |
| <b>NEUTRAL</b>   |              |                |             |                  |                |                 |              |
| Observed         | 192          | 85             | 143         | 435              | 409            | 221             | 243          |
| Expected         | 178.00       | 147.00         | 217.00      | 445.67           | 375.67         | 215.67          | 149.00       |
| ChiSq.           | 1.10         | 26.15          | 25.24       | 0.26             | 2.96           | 0.13            | 59.30        |
| Adj. std. res.   | 1.36         | -6.55          | -6.58       | -0.72            | 2.38           | 0.48            | 9.87         |

**Supplementary Table S1**

## **Electrophysiological results**

### **Global ERP waveform analysis Face\_1**

Results of the global ERP waveform analysis for Face\_1, performed as an additional control, were not significant for any of the considered comparisons (Fear vs. Neutral, Happiness vs. Neutral, Fear vs. Happiness), thus confirming that significant modulations found for Face\_2 could be explained only by the emotional scenes' content (Object-shot). For a comparison between global ERP waveform analysis for Face\_1 and for Face\_2, please see Supplementary Figure S1.

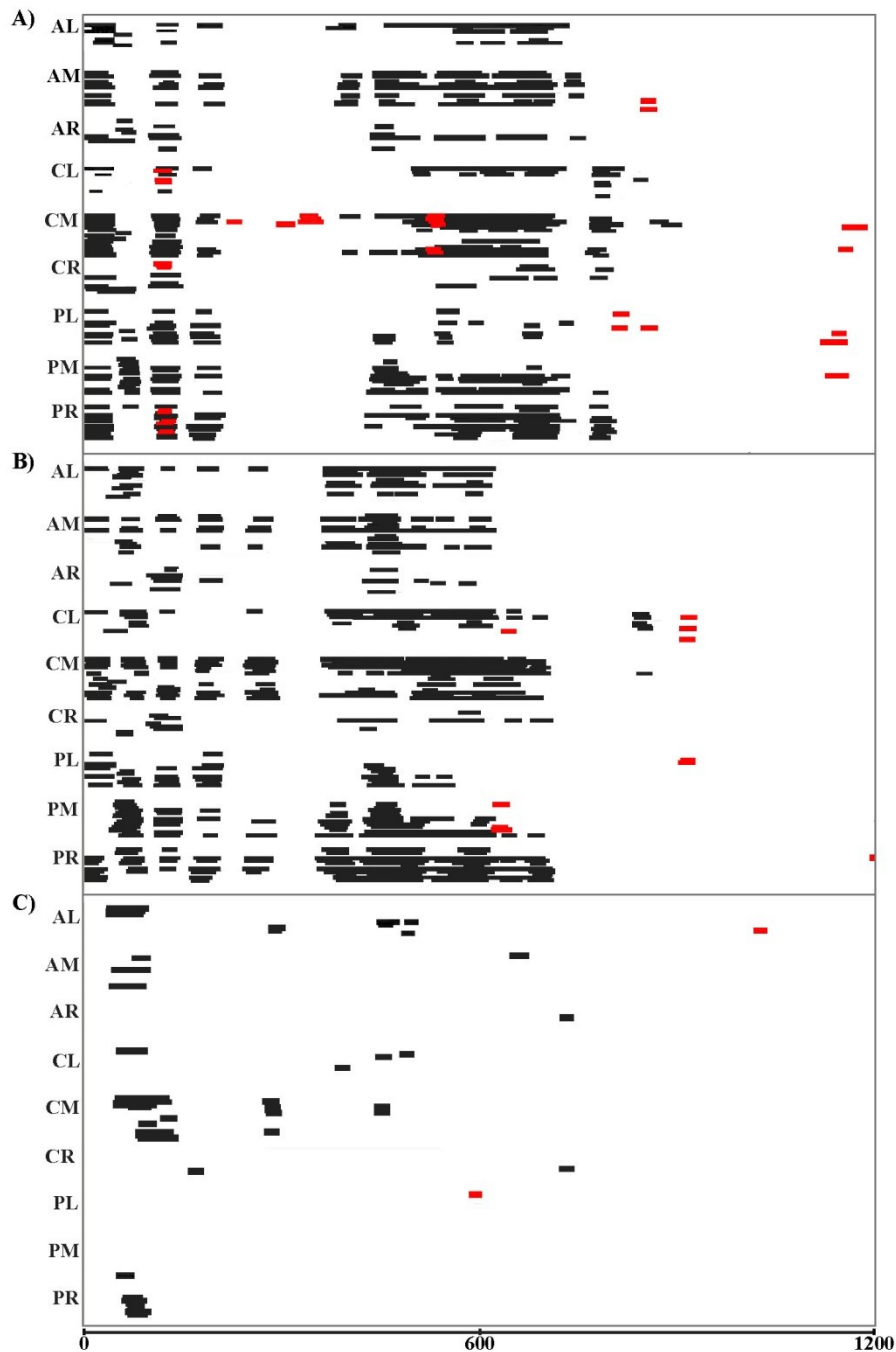

**Supplementary Fig.S1**

Superimposed statistical analyses of global ERP amplitude on Face\_1 (in red) and Face\_2 (in black) data for each comparison. Periods of significant differences of ERP amplitude ( $p < .01$ ; duration  $> 20$  ms) at each electrode and time point between conditions are displayed as horizontal lines. Each horizontal line represents one scalp electrode. AL: anterior left; AM: anterior midline; AR: anterior right. CL: central left; CM: central

midline; CR: central right. PL: posterior left; PM: posterior midline; PR: posterior right. A) Fear vs. Neutral; B) Happy vs. Neutral; C) Fear vs. Happy.

## **ERP analyses and results – N170 and LPP mean amplitude**

The mean amplitude of the posterior N170 response was measured at occipito-temporal (P9, P10) and occipital (O1, O2) sites between 160 and 210 ms after Face<sub>2</sub> onset. The mean amplitude of the posterior LPP was measured at occipito-temporal sites (PO7, P9, PO8, P10) in the 350-720 time window. ERP data were subjected to multifactorial repeated-measures ANOVAs with two within group factors: Condition (Neutral, Happiness, Fear) and Hemisphere (Left, Right). Multiple comparisons of the means were performed with Tukey's post-hoc tests. All data showed normal distribution in accord with Shapiro-Wilk test. The Mauchly test did not reveal any violation of sphericity.

**N170**: The ANOVA revealed a significant main effect of Condition ( $F_{(2,36)}=26,683$ ;  $p < .001$ ). Tukey post-hoc tests showed that the mean amplitude elicited by Neutral condition was significantly larger than that elicited by both Happiness and Fear conditions (Neutral: Mean -  $M = 0,89 \mu\text{V}$ ; Standard Error -  $SE = 0.18$ . Happiness:  $M = 1.53$ ;  $SE = 0.2$ . Fear:  $M = 1.70$ ;  $SE = 0.19$ ) ( $P_s < .00014$ ), while there was no a significant difference between Fear and Happiness conditions ( $p = .30$ ).

**LPP**: The ANOVA revealed a significant main effect of Condition ( $F_{(2,36)}=19,005$ ;  $p < .001$ ). Tukey post-hoc tests showed that the mean amplitude elicited by Neutral condition was significantly lower than that elicited by both Happiness and Fear conditions (Neutral:  $M = -0.53 \mu\text{V}$ ;  $SE = 0.15$ . Happiness:  $M = 0.16$ ;  $SE = 0.2$ . Fear:  $M = 0.03$ ;  $SE = 0.11$ ) ( $P_s < .00022$ ), while there was no a significant difference between Fear and Happiness conditions ( $p = .55$ ). The ANOVA revealed also a significant Condition\* Hemisphere interaction ( $F_{(2,36)}=5,2588$ ;  $p = .01$ ). Tukey post-hoc tests showed that the difference between Neutral and Happiness/Fear was significant on both Left and Right hemispheres ( $P_s < .0023$ ). Furthermore, there a was significant difference between Left and Right hemisphere only for Neutral condition ( $p = .0035$ ). (Left = Neutral:  $M = -0.32 \mu\text{V}$ ;  $SE = 0.13$ . Happiness:  $M = 0.13$ ;  $SE = 0.2$ . Fear:  $M = 0.14$ ;  $SE = 0.13$ ; Right = Neutral:  $M = -0.75 \mu\text{V}$ ;  $SE = 0.2$ . Happiness:  $M = 0.18$ ;  $SE = 0.19$ . Fear:  $M = -0.08$ ;  $SE = 0.15$ ).

## **ERP analyses and results – N170 peak latency**

To investigate the presence of significant differences in the latency of the N170 peak among conditions, we performed a repeated-measures ANOVA on the latency of the N170 peak, with two within group factors: Condition (Neutral, Happiness, Fear) and Hemisphere (Left, Right). The latency was measured at occipito-temporal (P9, P10) and occipital (O1, O2) sites between 160 and 210 ms after Face<sub>2</sub> onset. Multiple

comparisons of the means were performed with Tukey’s post-hoc tests. All data showed normal distribution in accord with Shapiro-Wilk test. The Mauchly test did not reveal any violation of sphericity.

The ANOVA revealed a significant main effect of Condition ( $F_{(2,36)}=35,077$ ;  $p < .001$ ). Tukey post-hoc tests showed that the N170 occurred significantly later for Neutral condition than for both Happiness and Fear conditions (Neutral:  $M = 163$  ms;  $SE = 2.5$ . Happiness:  $M = 146$  ms;  $SE = 2.9$ . Fear:  $M = 142$  ms;  $SE = 3.2$ ) ( $Ps < .00013$ ). There was no a significant difference between Fear and Happiness conditions ( $p = .33$ ).

## Experience and familiarity assessment

At the end of the whole experimental procedure, participants were asked to answer six open questions via Google Forms to assess their previous experience and their familiarity with the stimuli: 1) Have you ever seen these videos before? 2) What do you think the experiment was about? 3) Was there anything confusing in the experiment? 4) What was your impression of the different faces? 5) Do you have any other comments? 6) Have you heard of the Soviet filmmaker Lev Kuleshov and/or the “Kuleshov effect”? The table below (Supplementary Table S1) shows the answers from the entire sample of 24 participants.

| Questions                                                                        | Descriptions of answers                                                                                                                                                                                                                                       |
|----------------------------------------------------------------------------------|---------------------------------------------------------------------------------------------------------------------------------------------------------------------------------------------------------------------------------------------------------------|
| Have you ever seen these videos before?                                          | Only one participant had the impression of seeing some of the emotional contextual scenes before.                                                                                                                                                             |
| What do you think the experiment was about?                                      | Most participants thought it was about “ <i>emotions</i> ”, “ <i>empathy</i> ”, “ <i>facial expressions</i> ”. Some of them also considered the potential <i>role of context in influencing their perceptions and interpretations of facial expressions</i> . |
| Was there anything confusing in the experiment?                                  | While most participants did not find anything confusing, two of them reported that “ <i>some facial expressions did not clearly show an emotion</i> ” or “ <i>the emotional expression was too aseptic, difficult to place in a context</i> ”                 |
| What was your impression of the different faces?                                 | Several participants noted that the target faces seemed to be “ <i>similar</i> ” among each other in terms of emotional expressions, “ <i>fairly inexpressive</i> ”, “ <i>relatively sad</i> ”, or “ <i>calm</i> ”.                                           |
| Do you have any other comments?                                                  | Participants did not report relevant comments.                                                                                                                                                                                                                |
| Have you heard of the Soviet filmmaker Lev Kuleshov and/or the “Kuleshov effect” | None of the participants knew the “Kuleshov effect”                                                                                                                                                                                                           |

## Supplementary Table S2

### References

68. Bagby, R. M., Parker, J. D. A. & Taylor, G. J. The twenty-item Toronto Alexithymia scale—I. Item selection and cross-validation of the factor structure. *J. Psychosom. Res.* **38**, 23–32 (1994).
69. Davis, M. H. A Multidimensional Approach to Individual Differences in Empathy. *J. Pers. Soc. Psychol.* **44**, 113–126 (1983).
70. Carver, C. S. & White, T. L. Behavioral inhibition, behavioral activation, and affective responses to impending reward and punishment: The BIS/BAS Scales. *J. Pers. Soc. Psychol.* **67**, 319–333 (1994).
71. Spielberger, C. D., Gorsuch, R. L., and Lushene, R. E. *Manual for the State-Trait Anxiety Inventory*. (Palo Alto, CA: Consulting Psychologists Press, 1970).
72. Aquino, J. Includes R source code and/or documentation written by Dirk Enzmann, Marc Schwartz, Nitin Jain and Stefan Kraft. descr: Descriptive Statistics. R package version 1.1.4. <https://CRAN.R-project.org/package=descr> (2018).
